# Supplementary material
Source: publisher figshare collection journal article supplement (https://karger.figshare.com/articles/dataset/_/7938107)
Supplement: Supplementary file 2 [file 1]

## Supplementary Material: Tables

**Table 1.** Patient characteristics

|                                              | Total        | Basal cell carcinoma | Squamous cell carcinoma | In situ keratinocyte lesions* | Melanoma    | Lentigo maligna | Other**      |
|----------------------------------------------|--------------|----------------------|-------------------------|-------------------------------|-------------|-----------------|--------------|
| Lesions                                      | 159          | 69<br>(43%)          | 18<br>(11%)             | 15<br>(9%)                    | 18<br>(11%) | 27<br>(17%)     | 12<br>(8%)   |
| Female                                       | 86<br>(54%)  | 36<br>(52%)          | 5<br>(28%)              | 9<br>(60%)                    | 13<br>(72%) | 19<br>(70%)     | 4<br>(33%)   |
| Age, years<br>(mean ± SD)                    | 76 ± 10.3    | 75 ± 11.4            | 80 ± 8.2                | 81 ± 8.3                      | 78 ± 7.3    | 73 ± 8.1        | 70 ± 12.5    |
| Primary tumor                                | 136<br>(86%) | 60<br>(87%)          | 15<br>(83%)             | 11<br>(73%)                   | 15<br>(83%) | 23<br>(85%)     | 12<br>(100%) |
| Mean follow-up<br>(months ± SD)              | 43 ± 27      | 43 ± 25              | 35 ± 26                 | 40 ± 25                       | 51 ± 37     | 51 ± 24         | 26 ± 22      |
| Recurrences after RT                         | 20<br>(13%)  | 7<br>(10%)           | 2<br>(11%)              | 4<br>(27%)***                 | 3<br>(17%)  | 4<br>(15%)      | none         |
| Median time to recurrence<br>(months, range) | 13, 3-73     | 13, 3-44             | 9.5, 6-13               | 25.5, 4-73                    | 5, 4-20     | 11.5, 3-37      | -            |
| Other skin pre-/malignancies                 | 107<br>(67%) | 46<br>(67%)          | 17<br>(94%)             | 14<br>(93%)                   | 13<br>(72%) | 14<br>(52%)     | 3<br>(25%)   |
| Immunosuppression                            | 46<br>(29%)  | 8<br>(12%)           | 10<br>(56%)             | 6<br>(40%)                    | 8<br>(44%)  | 3<br>(11%)      | 11<br>(92%)  |

Legend: \*In situ keratinocyte lesions - actinic keratosis and Bowen's disease, \*\*Other - cutaneous lymphoma (mycosis fungoides, primary cutaneous T-cell lymphoma, diffuse large B-cell lymphoma) and Kaposi sarcoma, \*\*\*Actinic keratosis with 2 relapses out of 9 lesions (22%) and Bowen's disease with 2 relapses out of 6 lesions (33%).

**Table 2.** Radiotherapy parameters

| Diagnosis      | Electric Potential (kV) | Total dose (Gy) | Interval between treatments (days) | Irradiated area* median (cm <sup>2</sup> , range) |
|----------------|-------------------------|-----------------|------------------------------------|---------------------------------------------------|
| BCC            | 20-40                   | 36-52           | 2-4                                | 7, 2-25                                           |
| SCC            | 20-50                   | 36-52           | 3-4                                | 17, 6-85                                          |
| AK             | 10-20                   | 32-48           | 3-5                                | 19, 3-84                                          |
| BD             | 20-30                   | 36-44           | 3-5                                | 13, 8-17                                          |
| Melanoma       | 10-30                   | 48-120          | 3-4                                | 25, 7-54                                          |
| LM             | 10-20                   | 42-120          | 3-4                                | 23, 2-48                                          |
| MF             | 20-40                   | 12-22           | 2-4                                | 6, 4-33                                           |
| PCTCL          | 40                      | 26              | 3-4                                | 15                                                |
| DLBCL          | 30                      | 16              | 3-4                                | 27                                                |
| Kaposi Sarcoma | 30                      | 32              | 2-3                                | 5                                                 |

Legend: \*Lesion size with additional safety margin (BCC/SCC 10mm, AK/BD 10 mm, LM/LMM 15mm, MF 5-20mm, PCTCL/DLBCL 15mm, Kaposi sarcoma 10 mm), BCC - basal cell carcinoma, SCC - squamous cell carcinoma, AK - actinic keratosis, BD - Bowen's disease, LM - lentigo maligna, MF - mycosis fungoides, PCTCL - primary cutaneous T-cell lymphoma, DLBCL - diffuse large B-cell lymphoma.
